# Supplementary material for: Endothelial Lactate Controls Muscle Regeneration from Ischemia by Inducing M2-like Macrophage Polarization
Source: PubMed Central journal article supplement — Cell Metab. 2020 Jun 2;31(6):1136–1153.e7. doi: 10.1016/j.cmet.2020.05.004 (PMC7267778; doi:10.1016/j.cmet.2020.05.004), 2020-06-02
Supplement: mmc1.pdf [file mmc1.pdf]

**Supplemental Information**

**Endothelial Lactate Controls Muscle Regeneration**

**from Ischemia by Inducing M2-like**

**Macrophage Polarization**

**Jing Zhang, Jonathan Muri, Gillian Fitzgerald, Tatiane Gorski, Roberto Gianni-Barrera, Evi Masschelein, Gommaar D'Hulst, Paola Gilardoni, Guillermo Turiel, Zheng Fan, TongTong Wang, Mélanie Planque, Peter Carmeliet, Luc Pellerin, Christian Wolfrum, Sarah-Maria Fendt, Andrea Banfi, Christian Stockmann, Inés Soro-Arnáiz, Manfred Kopf, and Katrien De Bock**

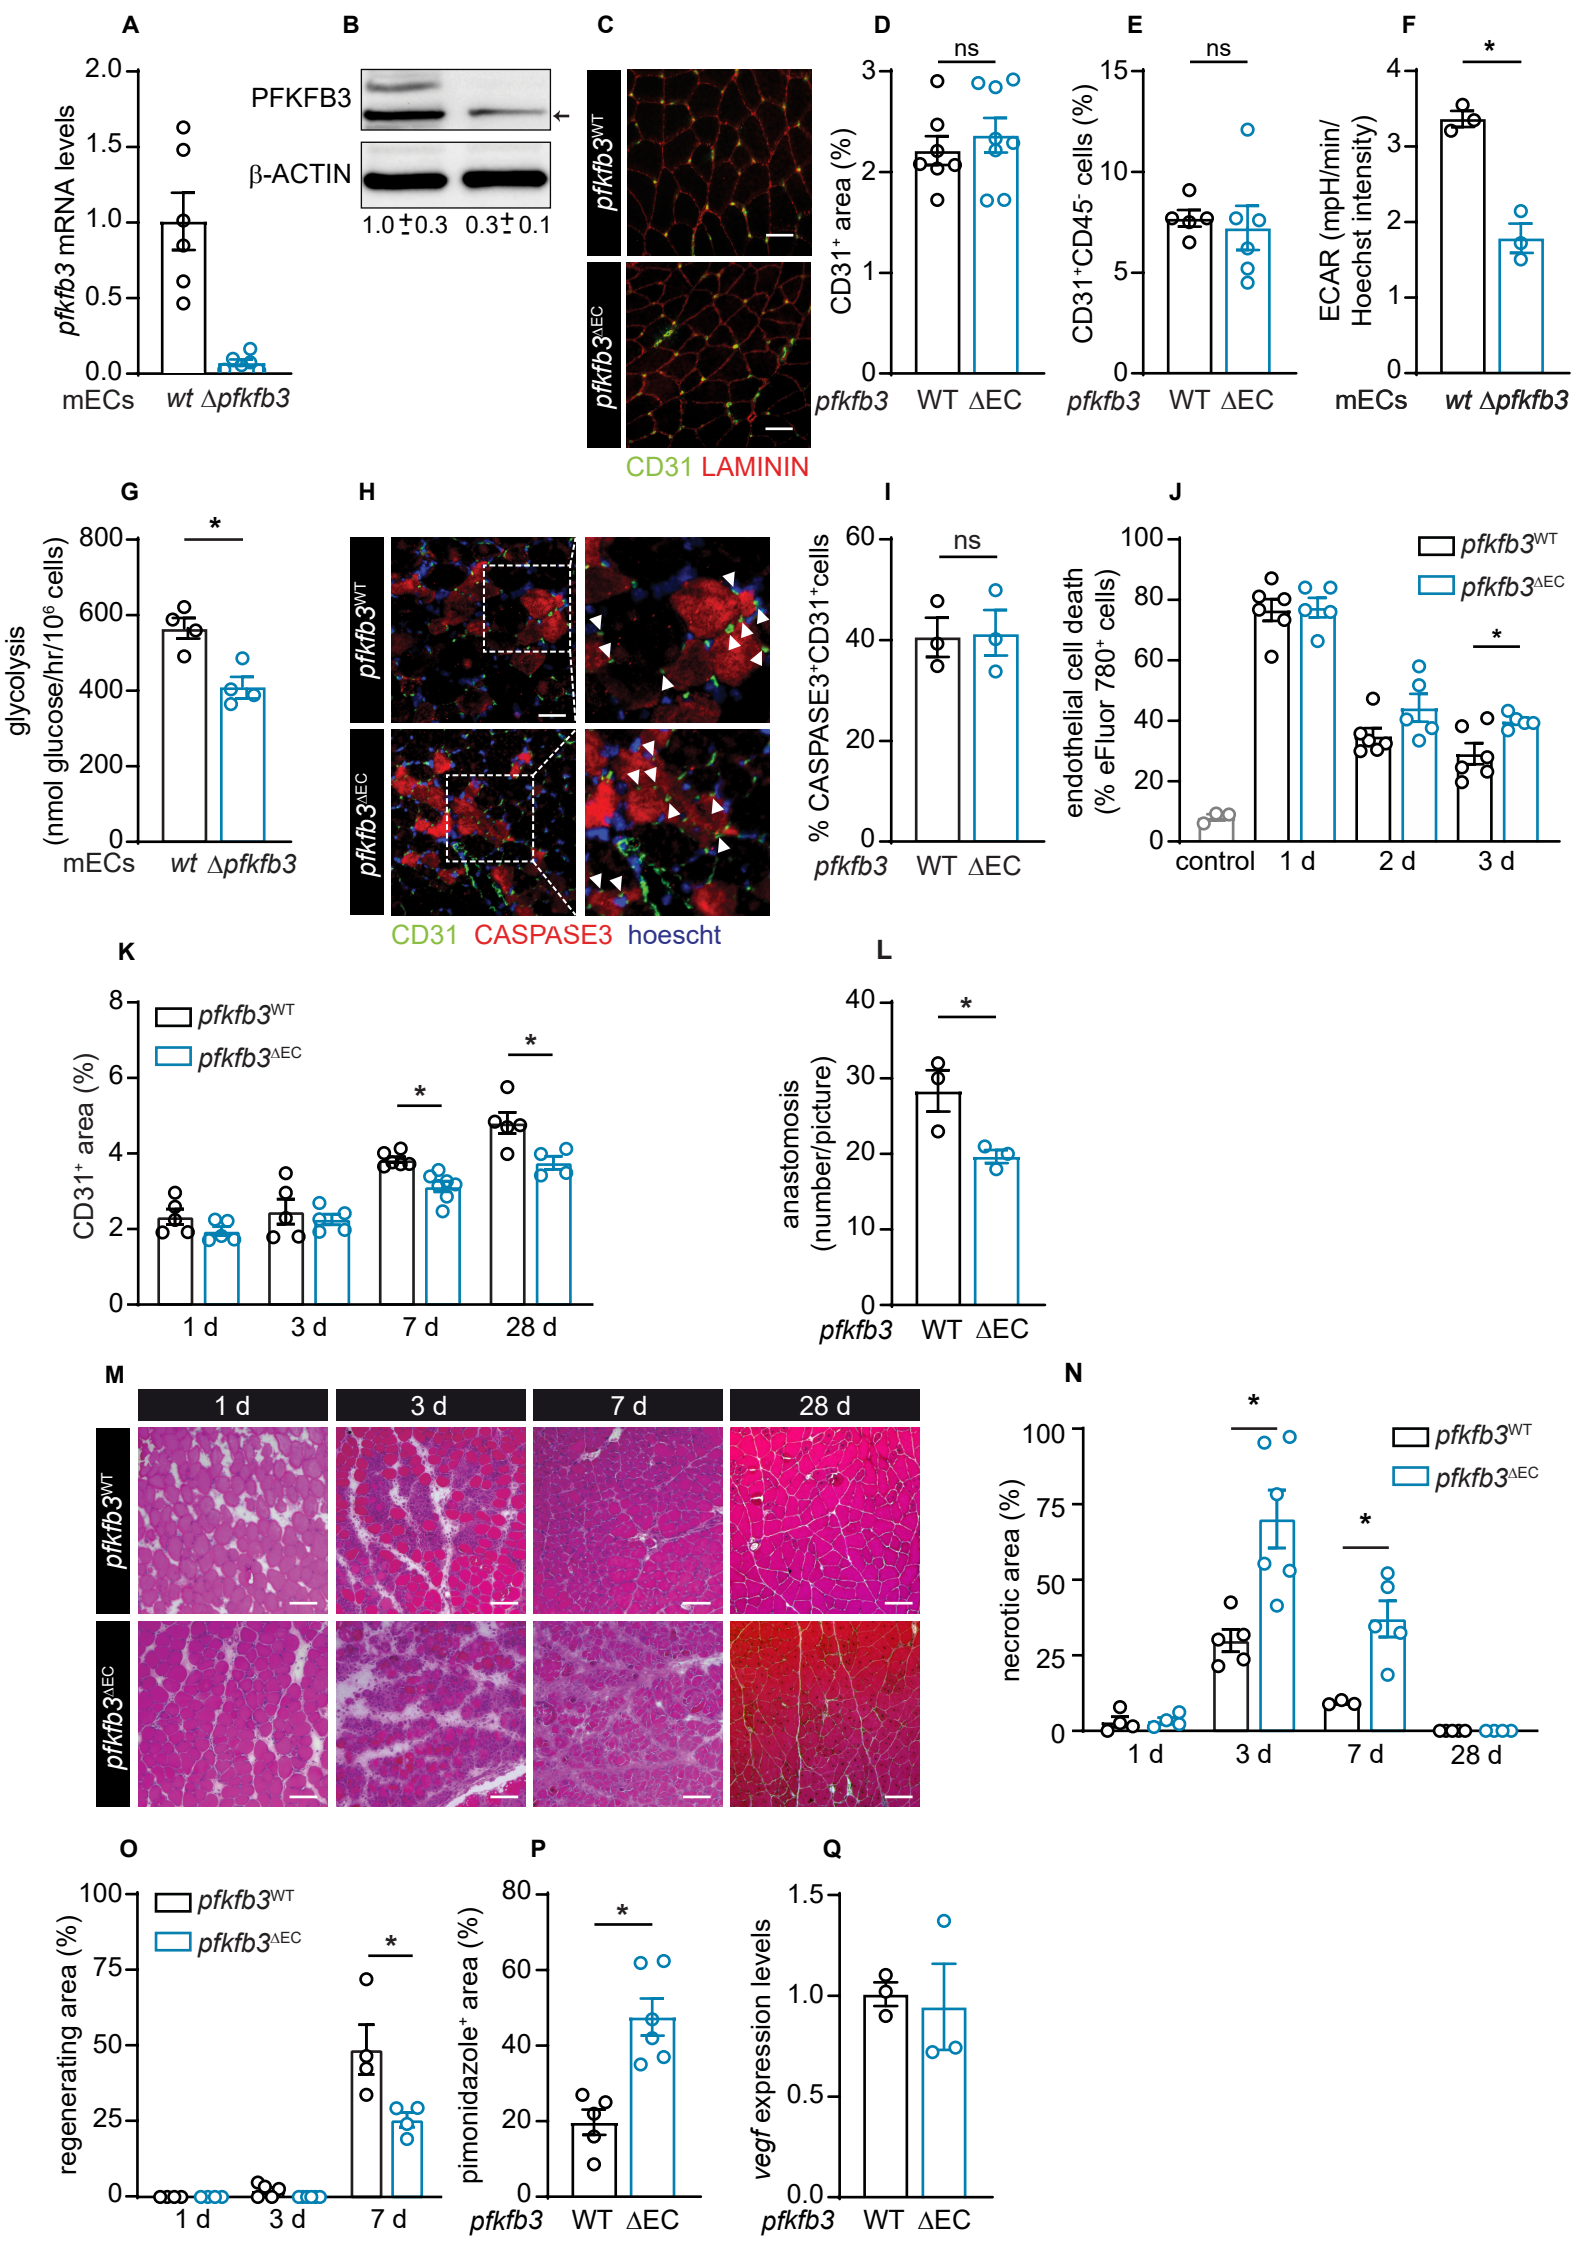

**Figure S1. Endothelial PFKFB3 controls EC glycolysis and ischemia induced revascularization. Related to Figure 1.**

(A-B) *Pfkfb3* mRNA (A) and PFKFB3 protein (B) levels (n=3) in isolated muscle endothelial cells from *pfkfb3*<sup>WT</sup> and *pfkfb3*<sup>ΔEC</sup> mice. PFKFB3 protein levels are corrected for β-ACTIN. The arrow indicates 50 kDa. (C-D) Representative images of immunostainings for CD31 (green) and laminin (red) (C) and quantification of CD31<sup>+</sup> area (D) in *pfkfb3*<sup>WT</sup> and *pfkfb3*<sup>ΔEC</sup> muscle. (E) Flow cytometry based quantification of the CD31<sup>+</sup>CD45<sup>-</sup> endothelial cell population (% of total mononuclear population) in muscle of *pfkfb3*<sup>WT</sup> and *pfkfb3*<sup>ΔEC</sup> mice. (F-G) Extracellular acidification rate (ECAR) (F) and glycolytic flux (G) in mECs isolated from *pfkfb3*<sup>WT</sup> and *pfkfb3*<sup>ΔEC</sup> mice. (H-I) Representative images of CASPASE3 (red), CD31 (green) and hoechst (blue) immunostainings (H) and quantification (I) of CASPASE3<sup>+</sup>CD31<sup>+</sup> cells in muscles 1 day after HLI. (J) Quantification of efluor780<sup>+</sup>CD31<sup>+</sup>CD45<sup>-</sup> dead endothelial cells in the control leg and in ischemic muscle at the indicated times. (K) Quantification of CD31<sup>+</sup> area on transverse cross sections of muscles harvested at the indicated times. (L) Quantification of anastomosis on longitudinal sections of muscles harvested 28 d after HLI. (M-O) Representative images of low magnification hematoxylin-eosin (H&E) stainings (M) and quantification of necrotic (N) and regenerating (O) areas at the indicated times. (P) Quantification of pimonidazole positive area 3 d after HLI. (Q) Quantification of *Vegf* gene expression levels in MPCs, isolated 3 d after HLI. Scale bar, 50 μm. Student's *t* test (two-tailed, unpaired) in A, D, E, F, G, I, J, L, P, Q (\**p* ≤ 0.05; ns, not significant). Two-way ANOVA with Tukey's multiple comparisons test in K, N, O (\**p* < 0.05). Each dot represents a single mouse. Bar graphs represents mean ± SEM.

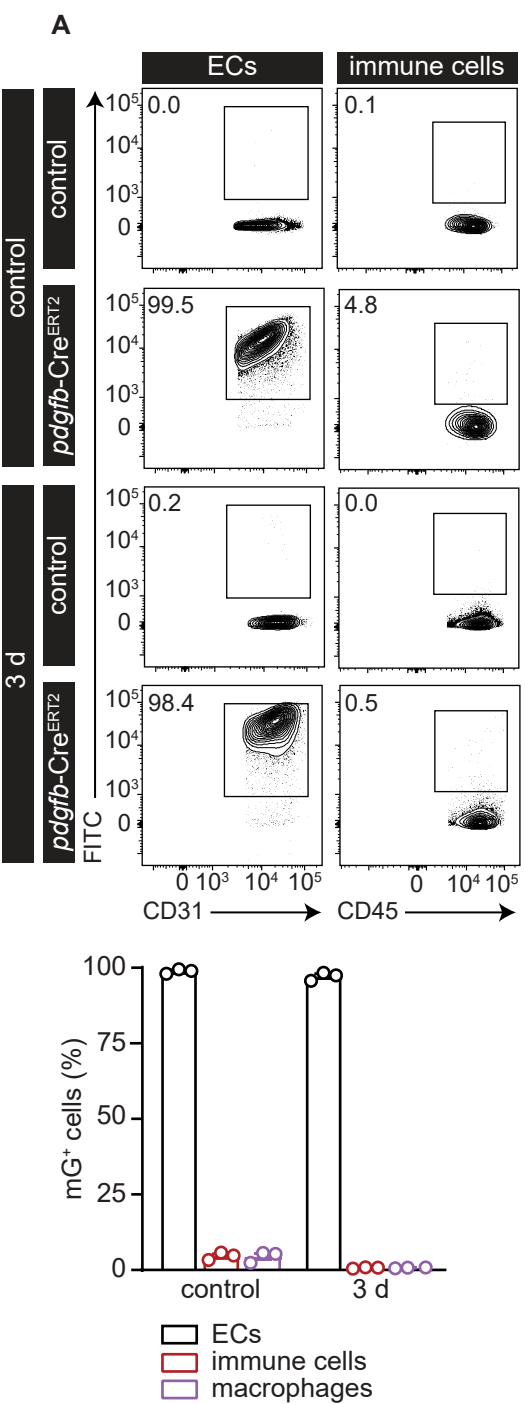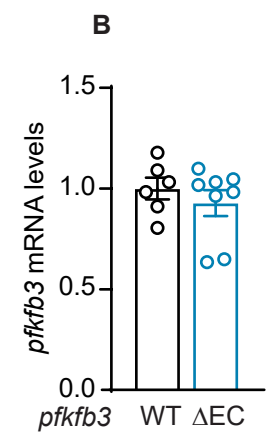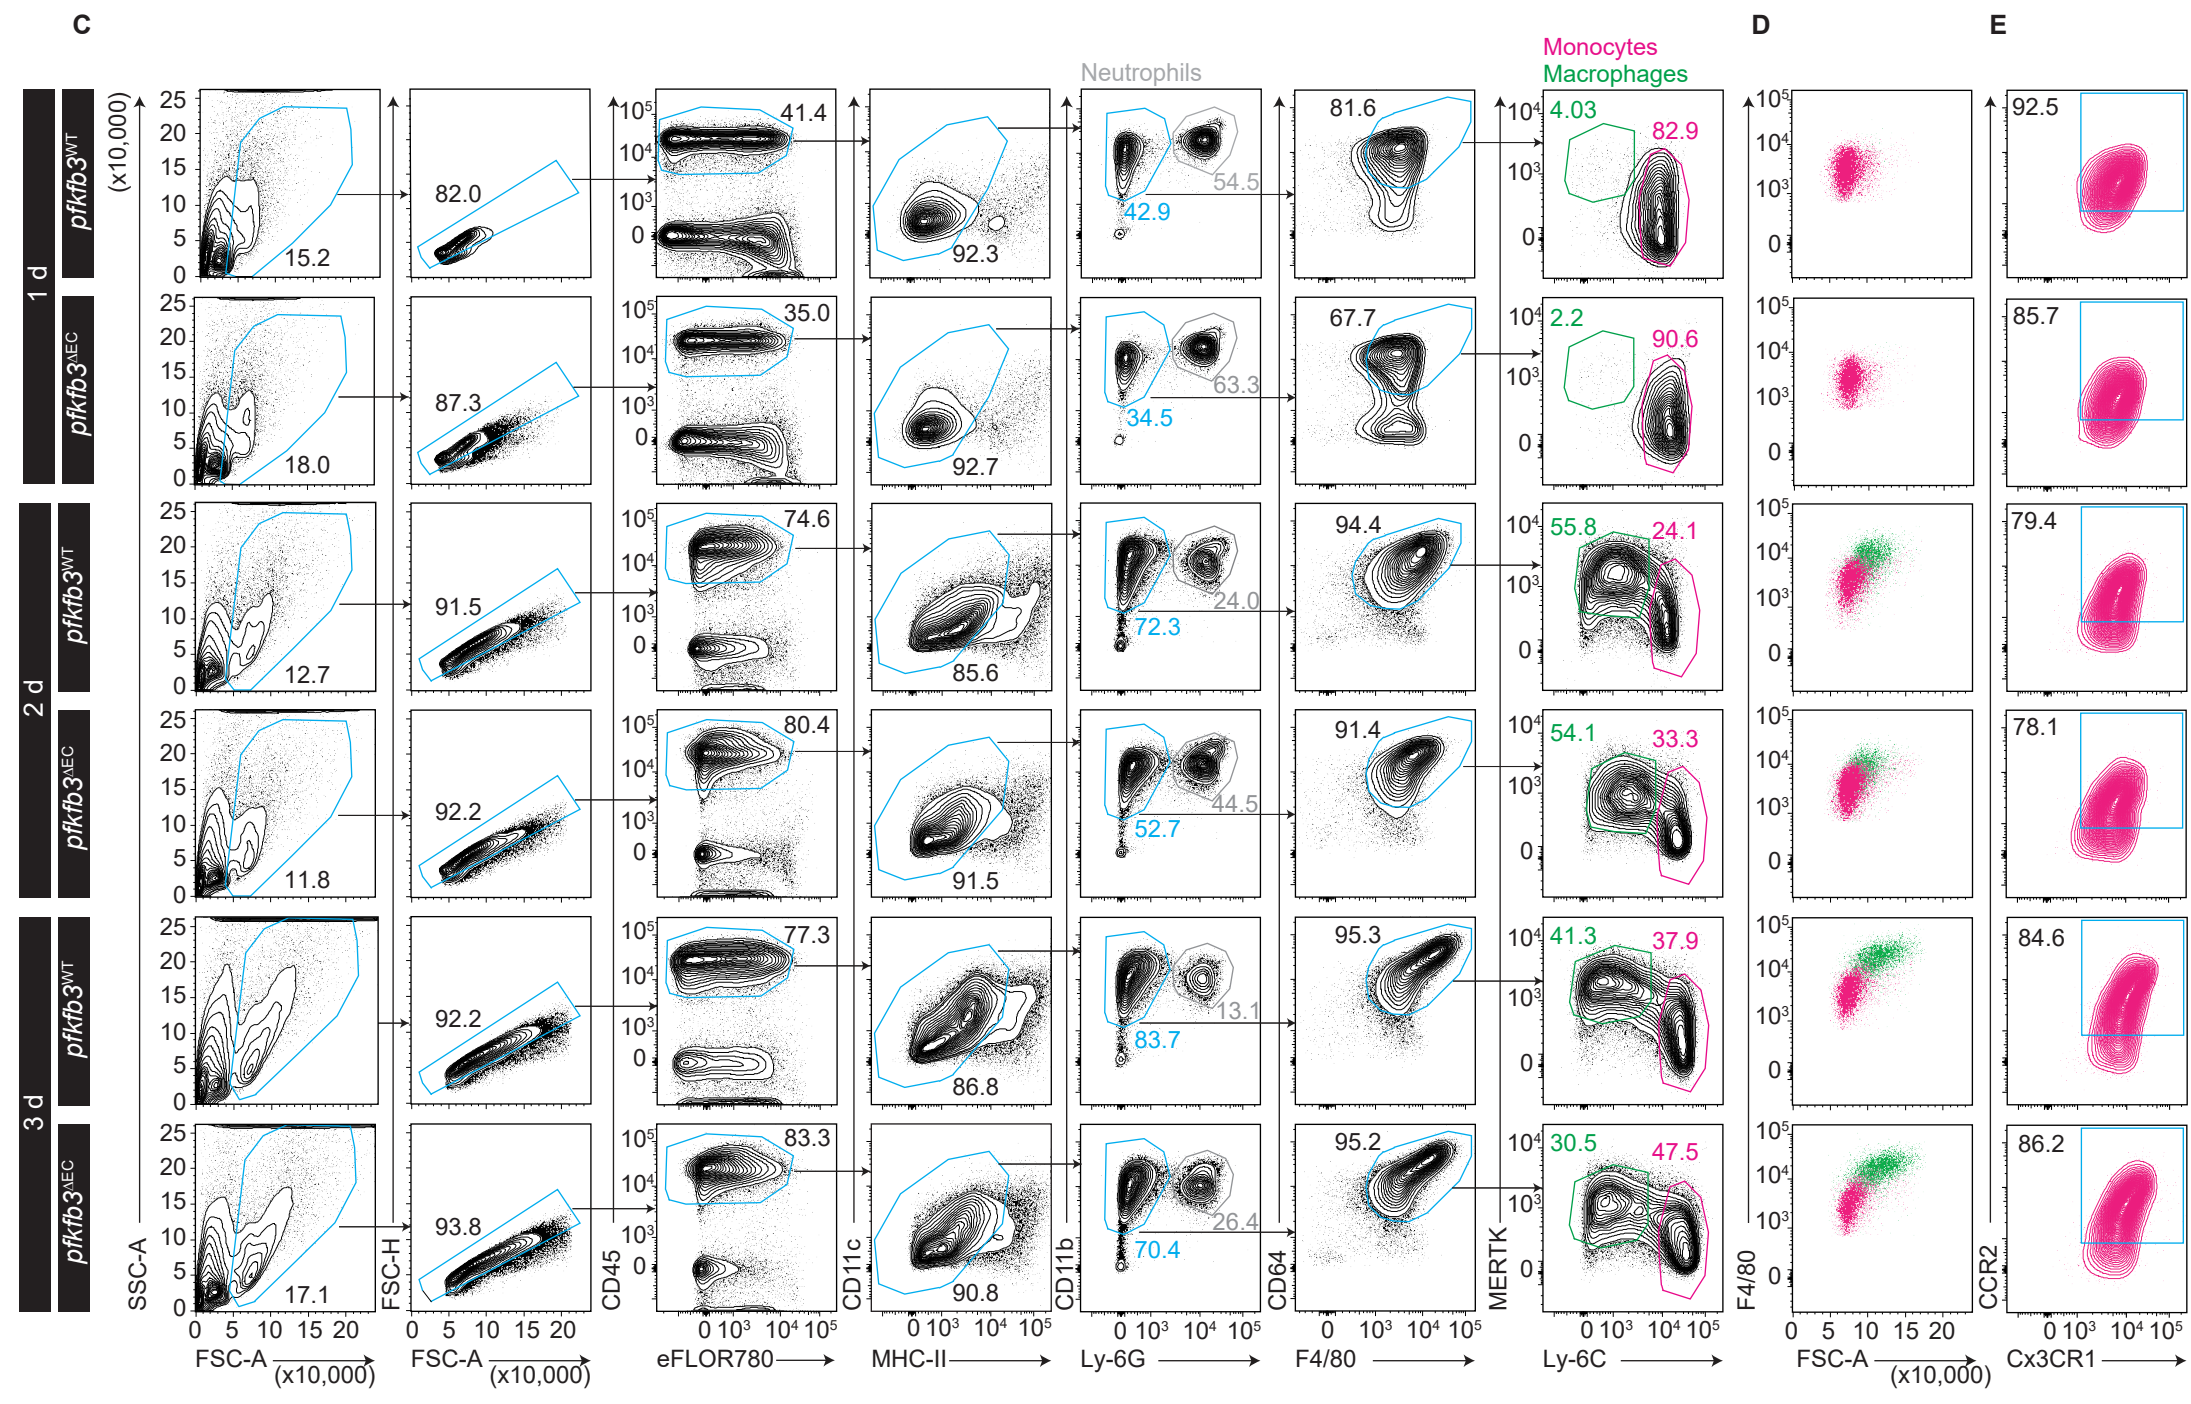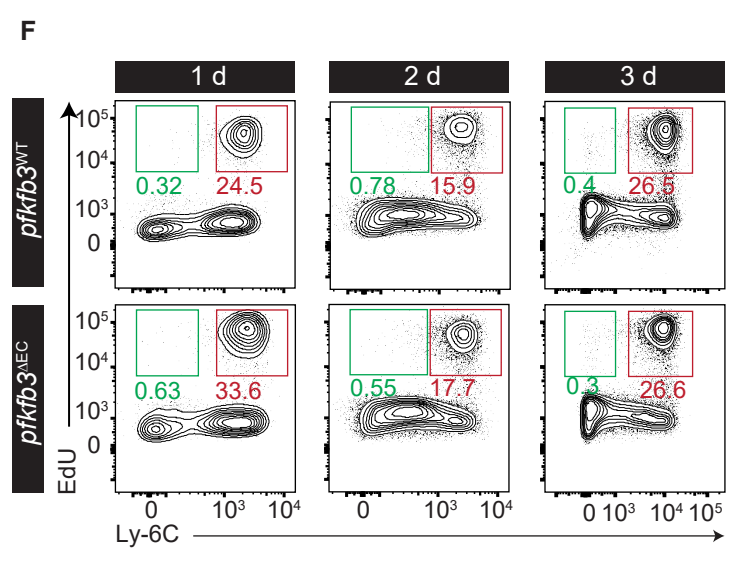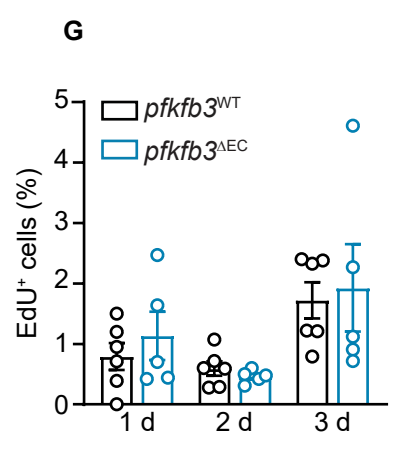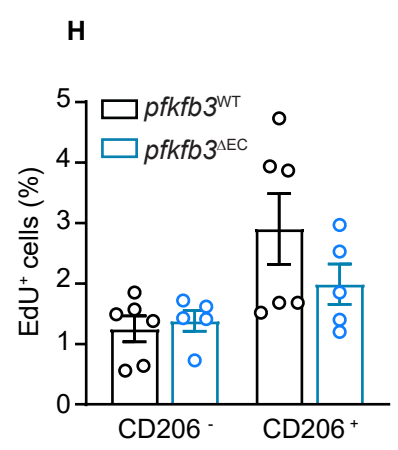



**Figure S2. Endothelial PFKFB3 is crucial for M2-like polarization of macrophages in the muscle. Related to Figure 2.**

(A) Flow cytometry analysis (top) and quantification (bottom) of mGFP<sup>+</sup>CD31<sup>+</sup> cell and mGFP<sup>+</sup>CD45<sup>+</sup> cell distribution in the muscle of *pdgfb-Cre*<sup>ERT2</sup> x *rosa*<sup>mTmG</sup> mice and their WT littermates before and 3 d after HLI. ECs, CD31<sup>+</sup>; immune cells, CD45<sup>+</sup>; macrophages, CD45<sup>+</sup>CD11b<sup>+</sup>F4/80<sup>+</sup>CD64<sup>+</sup>Ly-6G<sup>-</sup>Ly-6C<sup>-</sup>. (B) *Pfkfb3* gene expression in CD45<sup>+</sup> cells sorted from *pfkfb3*<sup>WT</sup> and *pfkfb3*<sup>ΔEC</sup> muscle 12 h after HLI. (C) Gating strategy for neutrophils, monocytes and macrophages isolated from ischemic muscle at the indicated time. (D) F4/80 expression and cellular size (FSC-A) of macrophages (green) and monocytes (pink) gated as described in (C). (E) CCR2 and CX3CR1 expression on monocytes (pink) gated as described in (C). (F) Flow cytometry analysis of EdU<sup>+</sup> macrophage (Ly-6C<sup>-</sup>) and monocyte (Ly-6C<sup>+</sup>) isolated from ischemic muscle at the indicated time. Shown are representative FACS plots pre-gated on CD45<sup>+</sup>CD11c<sup>-</sup>MHC-II<sup>-</sup>Ly-6G<sup>-</sup>CD11b<sup>+</sup>CD64<sup>+</sup>F4/80<sup>+</sup>. (G) Quantification of EdU<sup>+</sup> macrophages (% of total macrophages) in muscle at the indicated times after HLI determined by flow cytometry. (H) Quantification of EdU<sup>+</sup> CD206<sup>+</sup> macrophages and EdU<sup>+</sup> CD206<sup>-</sup> macrophages in muscle 72 h after HLI. Student's *t* test (two-tailed, unpaired) in B (\**p* < 0.05). Two-way ANOVA with Tukey's multiple comparisons test in G, H (\**p* < 0.05). Each dot represents a single mouse (B, G, H). Bar graphs represents mean ± SEM.

**A****GO pathway *pfkfb3*<sup>ΔEC</sup>/*pfkfb3*<sup>WT</sup>**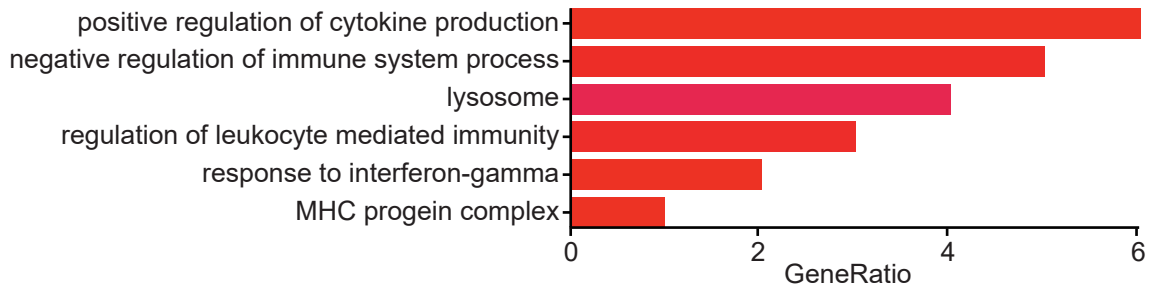

p. adjust

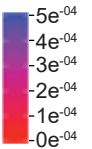

p. adjust

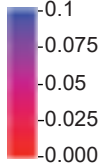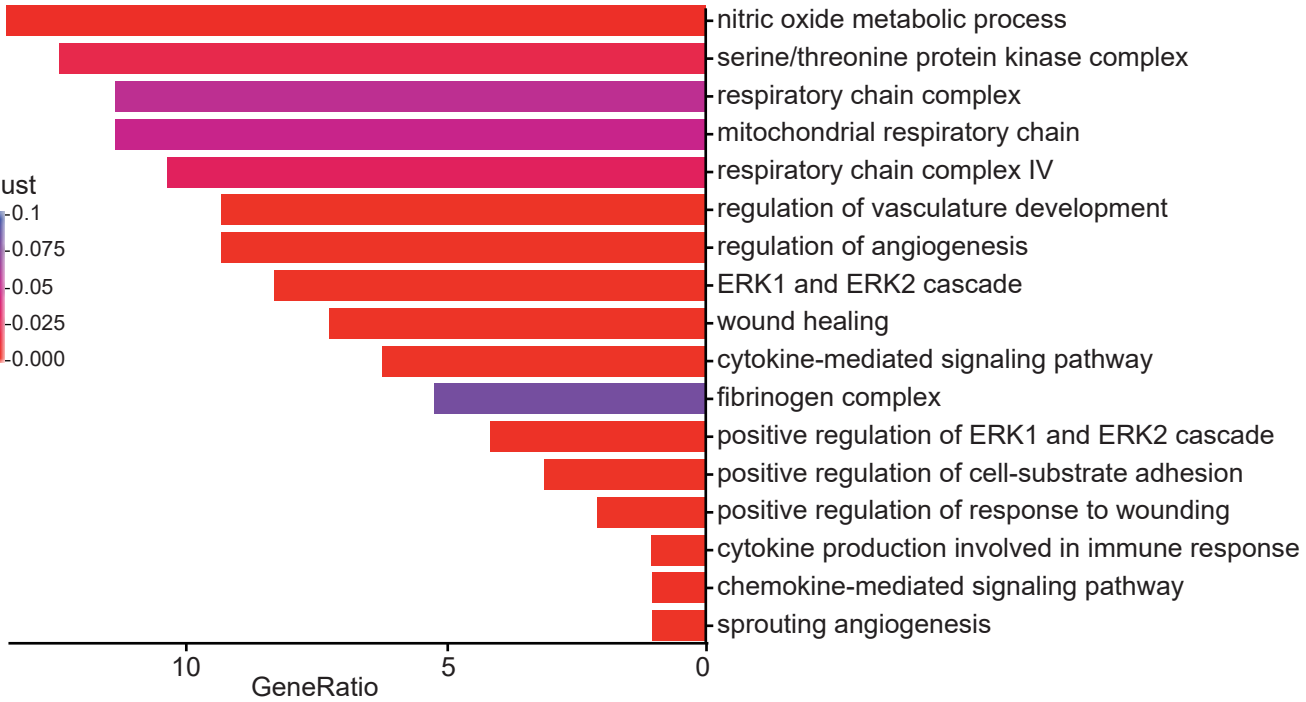**B****KEGG pathway *pfkfb3*<sup>ΔEC</sup>/*pfkfb3*<sup>WT</sup>**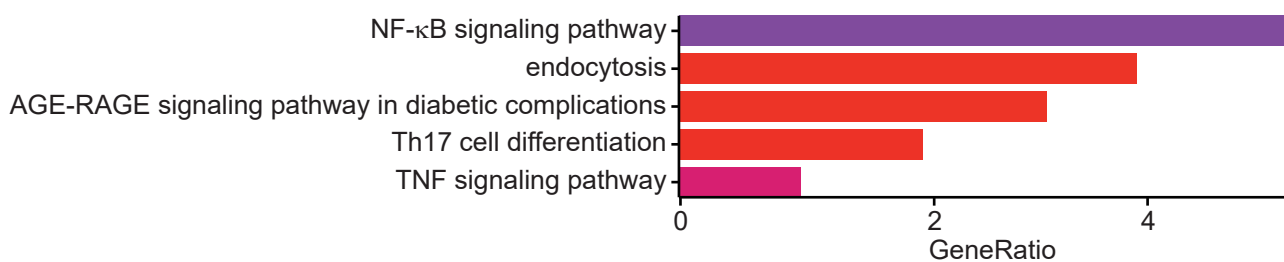

p. adjust

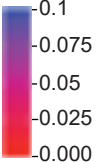

p. adjust

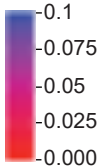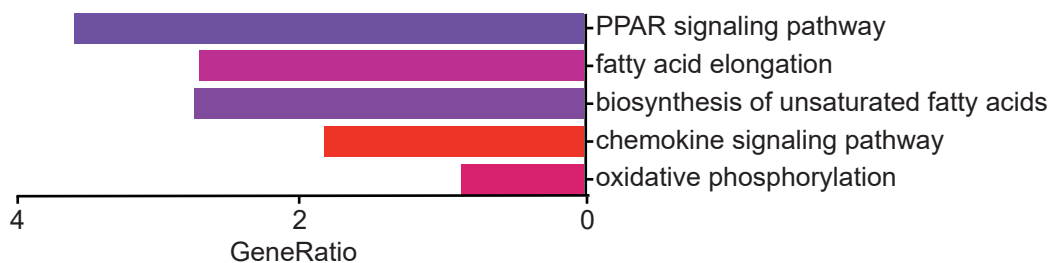

**Figure S3. Endothelial PFKFB3 is crucial for M2-like polarization of macrophages in the muscle. Related to Figure 2.**

**(A-B)** Gene ontology (GO) **(A)** and KEGG **(B)** pathway analysis for cellular components on macrophages isolated from ischemic muscles 3 d after HLI.

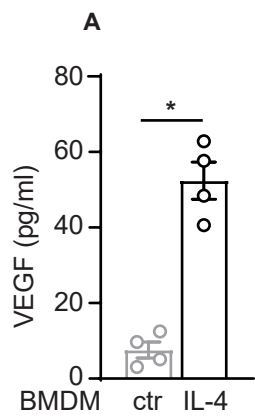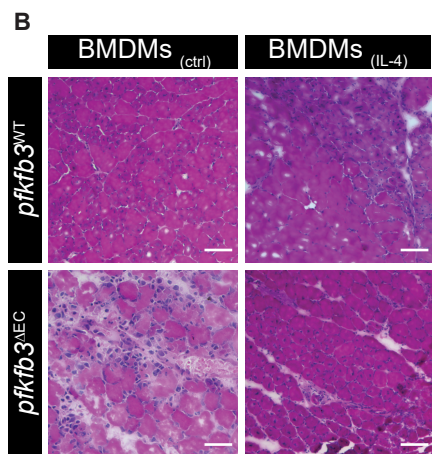



**Figure S4. Restoring M2 macrophage content in muscle of *pkfb3*<sup>ΔEC</sup> mice improves muscle perfusion and regeneration. Related to Figure 3.**

(A) VEGF secretion by BMDMs after stimulation with IL-4. (B) Representative low magnification images of hematoxylin-eosin (H&E) staining (scale bar, 50 μm). Student's *t* test (two-tailed, unpaired) in A (\**p* < 0.05). Each dot represents an independent experiment (A). Bar graph represents mean ± SEM.

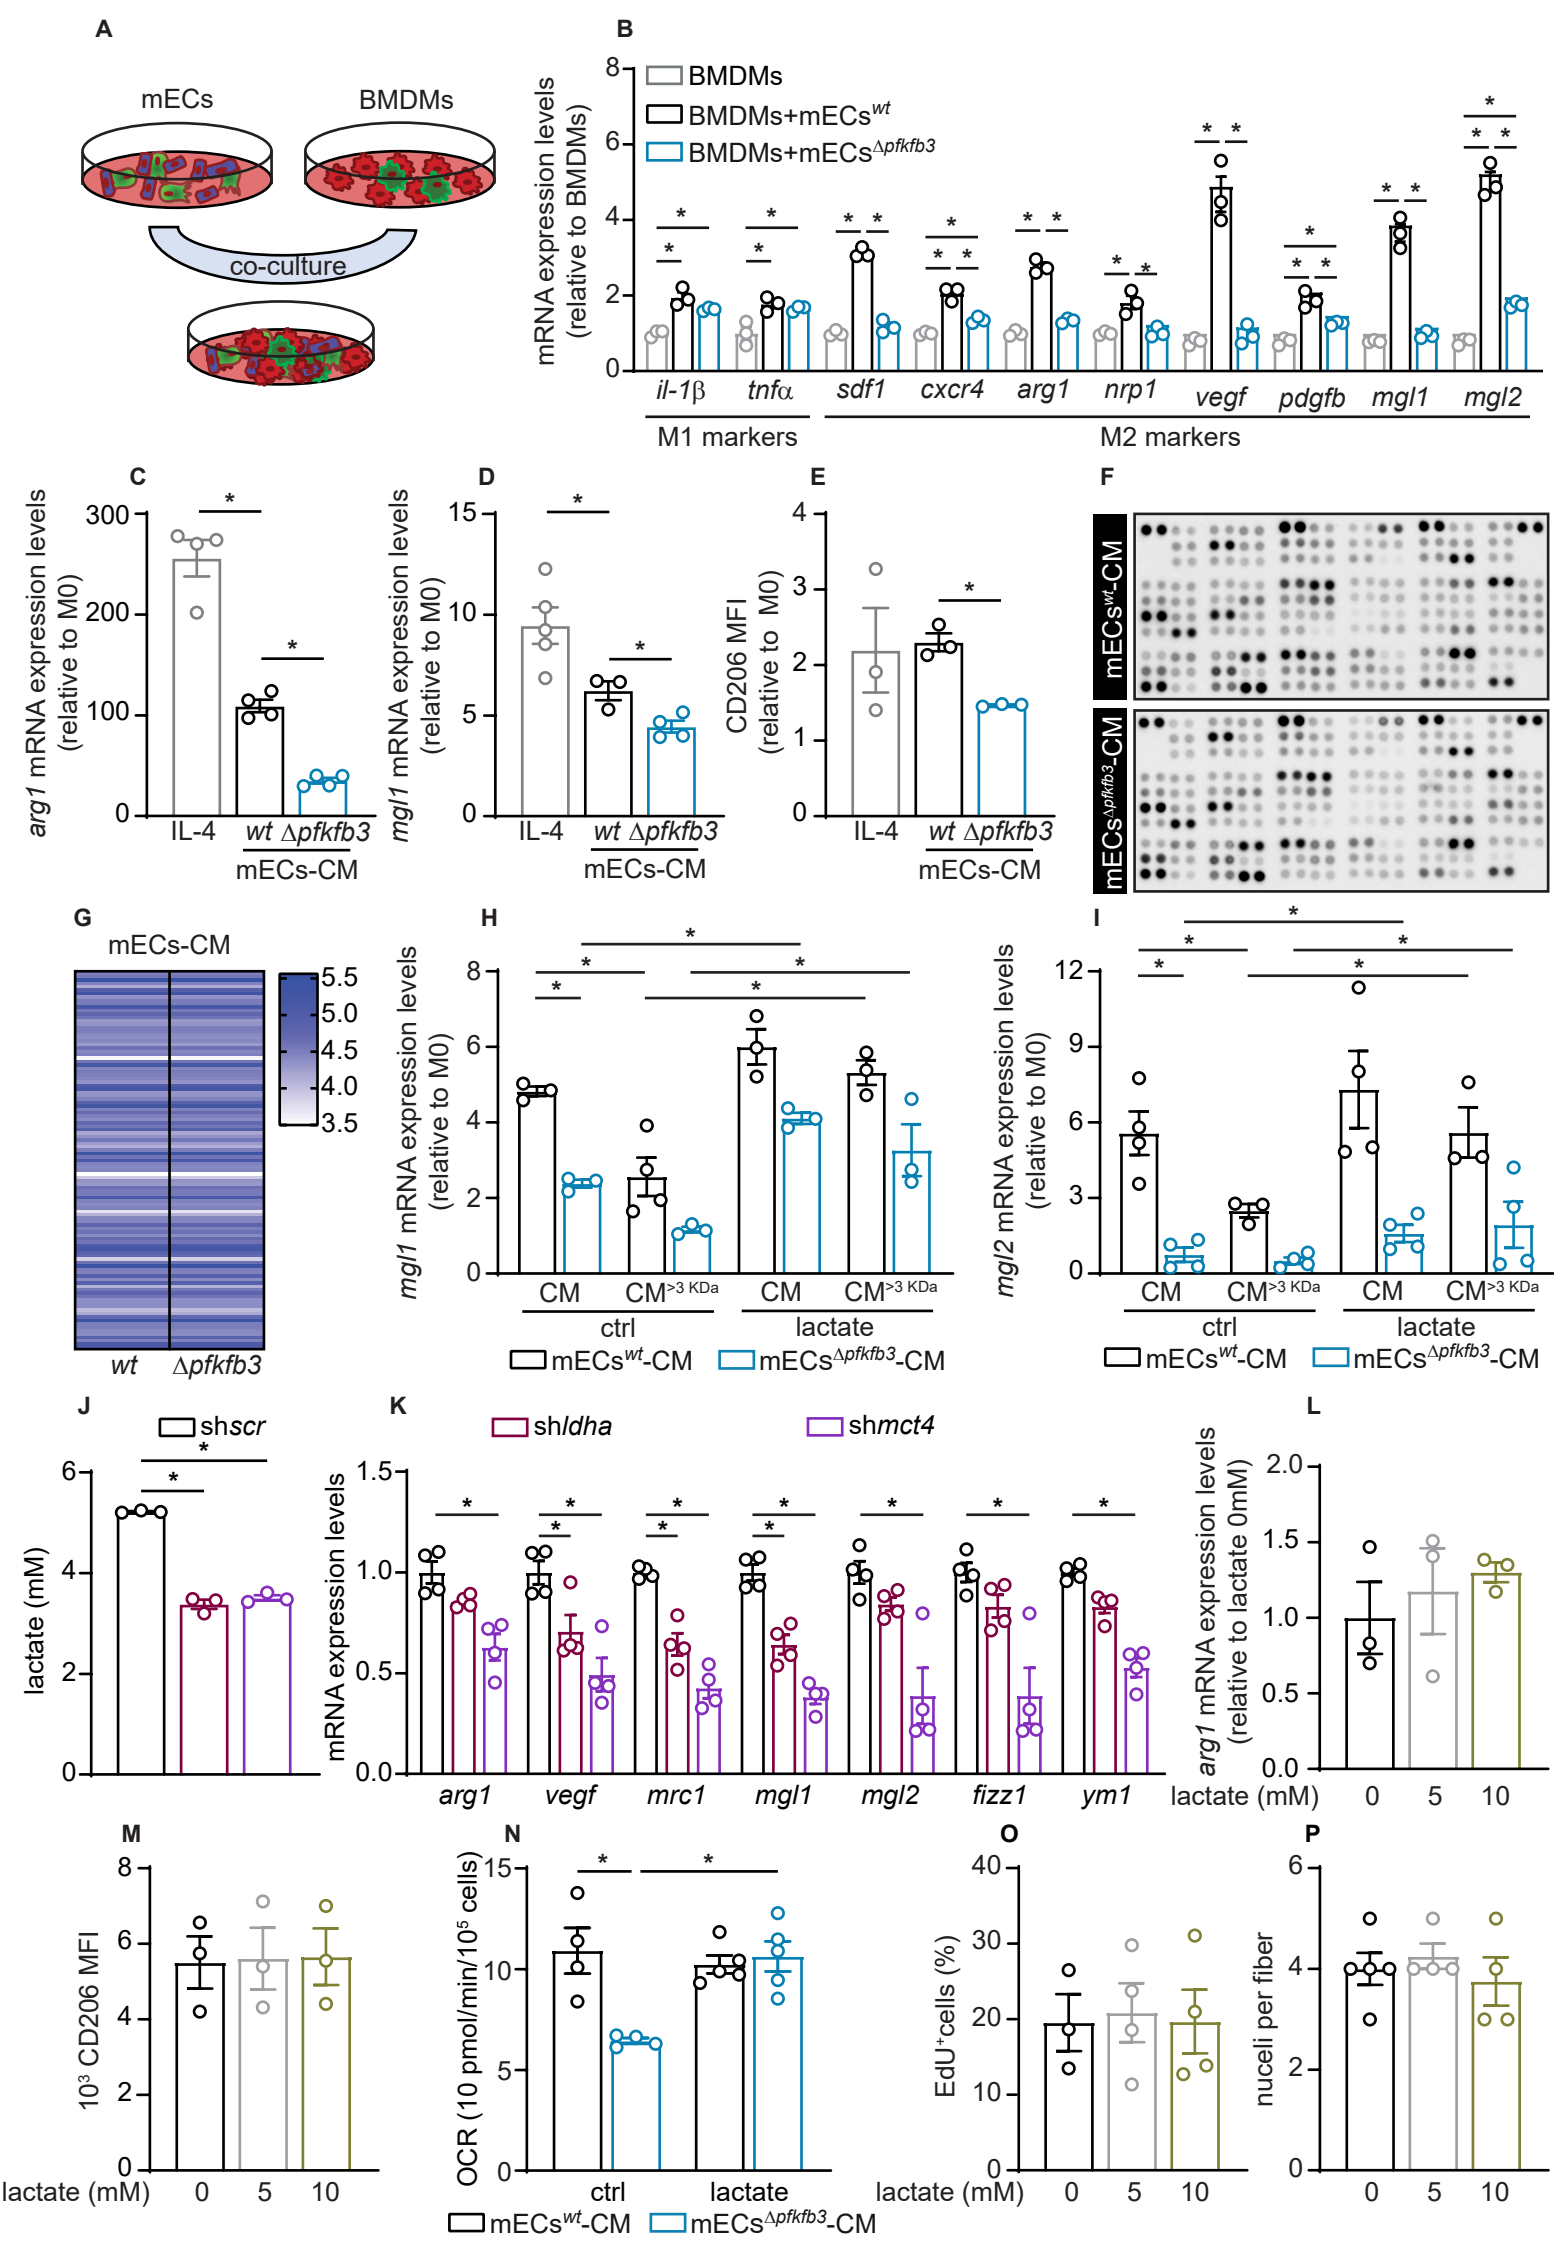

**Fig. S5. Endothelial lactate controls macrophage polarization and function upon muscle ischemia. Related to Figure 4.**

(A) Schematic illustration of co-culture of mECs with BMDMs. (B) Gene profiling of CD11b<sup>+</sup>F4/80<sup>+</sup> BMDMs 24 h after co-culture of BMDMs with mECs isolated from *pfkfb3*<sup>WT</sup> and *pfkfb3*<sup>ΔEC</sup> mice. (C-D) *Arg1* (C) and *mg11* (D) gene expression in BMDMs after stimulation with IL-4 or mECs-CM. (E) Quantification of CD206 mean fluorescence intensity (MFI) in BMDMs by flow cytometry after stimulation with IL-4 or mECs-CM. (F-G) Representative images (F) and heat map analysis (G) of cytokine profile array of mECs<sup>wt</sup>-CM and mECs<sup>Δpfkfb3</sup>-CM. (H-I) Gene expression analysis of *mg11* (H) and *mg12* (I) in BMDMs upon incubation with CM derived from mEC<sup>wt</sup> or mEC<sup>Δpfkfb3</sup>. (J) Lactate concentration in CM derived from *scr*, *ldha* and *mct4* knockdown HUVECs. (K) Gene expression analysis of M2 markers in BMDMs stimulated with *scr*, *ldha* and *mct4* knockdown HUVEC-derived CM. (L) *Arg1* gene expression BMDMs cultured in the presence of increasing concentrations of lactate. (M) Flow cytometry based quantification of CD206 mean fluorescence intensity (MFI) in BMDMs cultured in the presence of increasing concentrations of lactate. (N) Maximal oxygen consumption rate (OCR) of BMDMs after mECs<sup>wt</sup>-CM, mECs<sup>Δpfkfb3</sup>-CM, mECs<sup>wt+lac</sup>-CM, mECs<sup>Δpfkfb3+lac</sup>-CM, mECs<sup>wt+AZD</sup>-CM, mECs<sup>Δpfkfb3+AZD</sup>-CM stimulation. (O-P) MPC proliferation measured as percentage of EdU<sup>+</sup> cells (O) and fusion analysis after DESMIN labeling (P) in the presence of increasing concentrations of lactate. One-way ANOVA with Tukey's multiple comparisons test in B, C, D, E, J, K, L, M, O, P (\*p < 0.05). Two-way ANOVA with Tukey's multiple comparisons test in G, H, I, N (\*p < 0.05). Each dot represents an independent experiment. Bar graphs represents mean ± SEM.

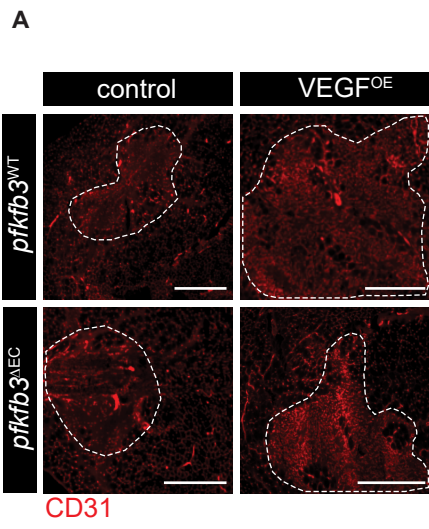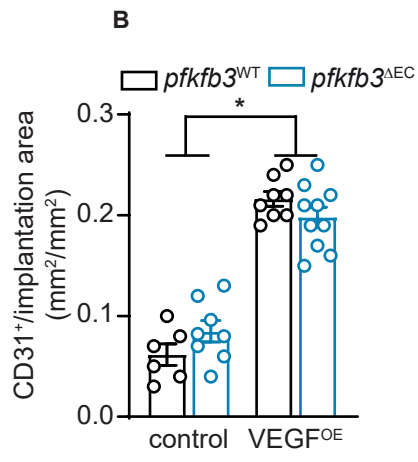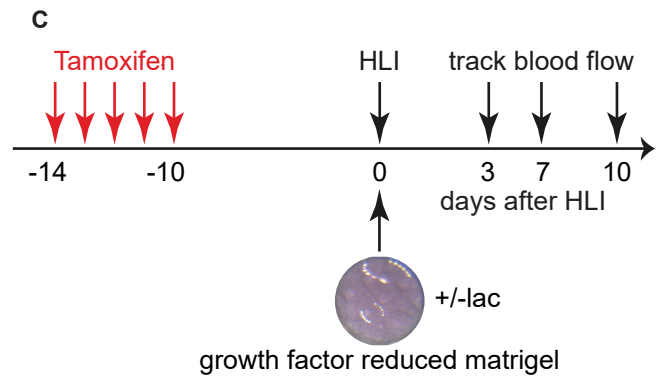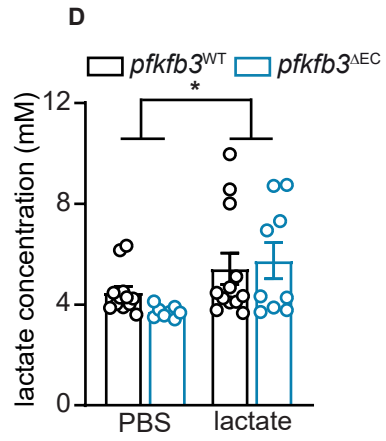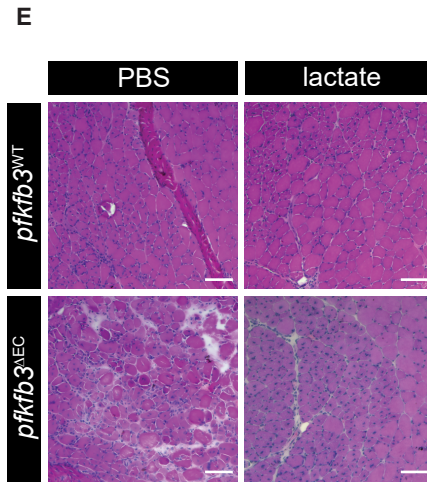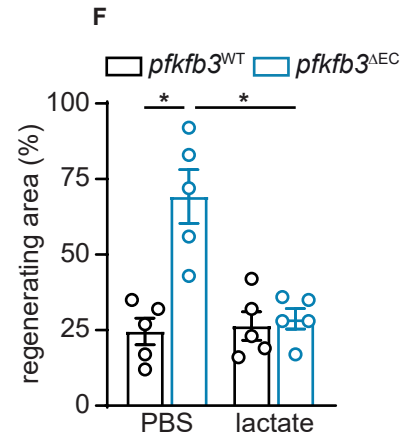



**Fig. S6. Increasing muscle lactate levels in *pfkfb3<sup>ΔEC</sup>* mice restores M2 macrophage content and improves muscle reperfusion and regeneration. Related to Figure 5.**

(A-B) Representative images of CD31 immunofluorescent staining (A) and quantification of CD31<sup>+</sup> area (B) in muscle 12 d after vegf overexpression myoblast injection. (C) Schematic illustration of lactate (lac) explant experiments. (D) Lactate concentration in serum of *pfkfb3<sup>WT</sup>* and *pfkfb3<sup>ΔEC</sup>* mice obtained 3 d after HLI treated with PBS (control) or lactate. (E-F) Representative low magnification images of hematoxylin-eosin (H&E) staining (E) and quantification of regenerating area (F) 12 days after HLI. Scale bar, 50 μm. Two-way ANOVA with Tukey's multiple comparisons test in B, D, F (\*p < 0.05). Each dot represents a single mouse (B, D, F). Bar graphs represents mean ± SEM.

**A**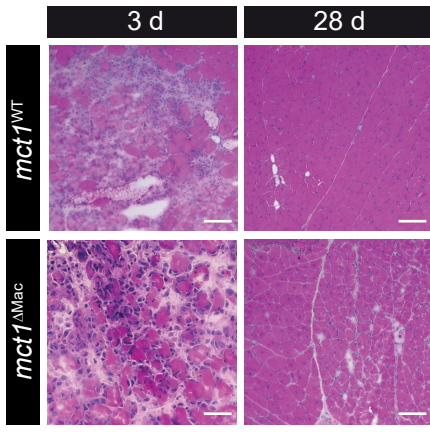**B**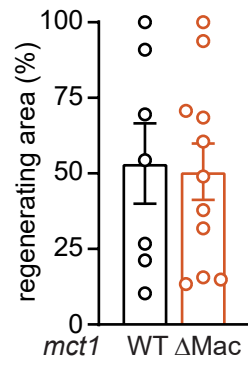

**Fig. S7. Loss of MCT1 in macrophages impairs M2-like macrophage polarization and muscle recovery from ischemia. Related to Figure 7.**

(**A-B**) Representative low magnification images of hematoxylin-eosin (H&E) staining at the indicated time points (**A**) and quantification of regenerating area (**B**) 28 d after HLI. Student's *t* test (two-tailed, unpaired) in **B** (\**p* < 0.05). Each dot represents a single mouse (**B**). Bar graphs represents mean ± SEM.

**Table S1. LC-MS/MS mediated determination of metabolites in conditioned media collected from *wt* and  $\Delta$ *pfkfb3* mECs after culturing at confluence for 2 days (n=3). Related to Figure 5.**

| <b>metabolites</b> | <b><i>pfkfb3</i><sup>WT</sup> (mean <math>\pm</math> SEM)</b> | <b><i>pfkfb3</i><sup><math>\Delta</math>EC</sup> (mean <math>\pm</math> SEM)</b> |
|--------------------|---------------------------------------------------------------|----------------------------------------------------------------------------------|
| succinate          | 16.80 $\pm$ 7.60                                              | 30.20 $\pm$ 6.88                                                                 |
| fumarate           | 5.83 $\pm$ 1.58                                               | 7.37 $\pm$ 0.29                                                                  |
| citrate            | 13.33 $\pm$ 2.24                                              | 10.07 $\pm$ 1.86                                                                 |
| glutamate          | 316.73 $\pm$ 66.48                                            | 283.23 $\pm$ 51.12                                                               |
| malate             | 18.90 $\pm$ 1.00                                              | 21.73 $\pm$ 1.03                                                                 |
| a-KG               | 1.07 $\pm$ 0.61                                               | 1.233 $\pm$ 0.28                                                                 |
| arginine           | 12.93 $\pm$ 0.48                                              | 12.27 $\pm$ 0.32                                                                 |
| aspartate          | 287.27 $\pm$ 27.2                                             | 260.3 $\pm$ 41.16                                                                |



**Table S2. Sequences of primers used for RT-PCR. Related to Figure 4 and Figure S5 .**

| <b>gene</b>                   | <b>Forward</b>            | <b>reverse</b>            |
|-------------------------------|---------------------------|---------------------------|
| <i>18s</i>                    | AGTCCCTGCCCTTTGTACACA     | CGATCCGAGGGCCTCACTA       |
| <i>pfkfb3</i>                 | TATGAAGCCAGCTACCAGCC      | TCTGGATGTGGTCCTGCAC       |
| <i>il-1<math>\beta</math></i> | AGTTGACGGACCCCAAAG        | AGCTGGATGCTCTCATCAGG      |
| <i>tnf<math>\alpha</math></i> | CTCTTCTGTCTACTGAACTTCGG   | AAGATGATCTGAGTGTGAGGGT    |
| <i>cxcl10</i>                 | GCTGCCGTCATTTTCTGC        | TCTCACTGGCCCGTCATC        |
| <i>sdf1</i>                   | CCAAACTGTGCCCTTCAGAT      | ATTCGGGTCAATGCACACT       |
| <i>cxcr4</i>                  | TGGAACCGATCAGTGTGAGT      | GGCAGGAAGATCCTATTGA       |
| <i>arg1</i>                   | CCACAGTCTGGCAGTTGGAAG     | GGTTGTCAGGGGAGTGTTGATG    |
| <i>nrp1</i>                   | TCCTGGGAAACTGGTATATCTATGA | CATTCCAGAGCAAGGATAATCTG   |
| <i>vegf</i>                   | CTTGTTTCAGAGCGGAGAAAGC    | ACATCTGCAAGTACGTTTCGTT    |
| <i>pdgfb</i>                  | AGCAGAGCCTGCTGTAATCG      | GGCTTCTTTTCGCACAATCTC     |
| <i>mgl1</i>                   | CAGAATCGCTT AGCCAATGTGG   | TCCCAGTCCGTGTCCGAAC       |
| <i>mgl2</i>                   | TTCAAGAATTGGAGGCCACT      | CAGACATCGTCATTCCAACG      |
| <i>mrc1</i>                   | CTCTGTTTCAGCTATTGGACGC    | CGGAATTTCTGGGATTCAGCTTC   |
| <i>ldha</i>                   | TCTCTGTAGCAGATTTGGCAGA    | AAGACATCATCCTTTATTCCGTAAG |
| <i>mct4</i>                   | AGCAGGTATCCTTGAGACGG      | GATGGCAAAGCAGATGGTGT      |
| <i>mct1</i>                   | GGGCTAAAGCCACAGTCCAT      | TCTGCTAAGTGCCACACAGG      |
